# Supplementary material for: Enhanced hydrogen evolution by nanostructures CuO composites
Source: Research Square preprint supplement (doi:10.21203/rs.3.rs-7626843/v1), 2025-11-03
Supplement: Supplementary file 1 [file b7b2f1e5f427b85b3583ef65.docx]

**Supporting information**

Bharat Kumara, b*

**Table S1: Weight fraction of micron sized CuO and copper oxalate in nano-micron composites of CuO**

| S. No. | Compounds | Weight of CuO(g) | Weight of copper oxalate (g) |
| --- | --- | --- | --- |
| 1 | Pure micron | 2 | 0 |
| 2 | 20 % nano-micron composites | 1.6 | 0.4 |
| 3 | 40 % nano-micron composites | 1.2 | 0.8 |
| 4 | 50 % nano-micron composites | 1.0 | 1.0 |
| 5 | 60 % nano-micron composites | 0.8 | 1.2 |
| 6 | 80 % nano-micron composites | 0.4 | 1.6 |
| 7 | Pure nano | 0 | 2 |


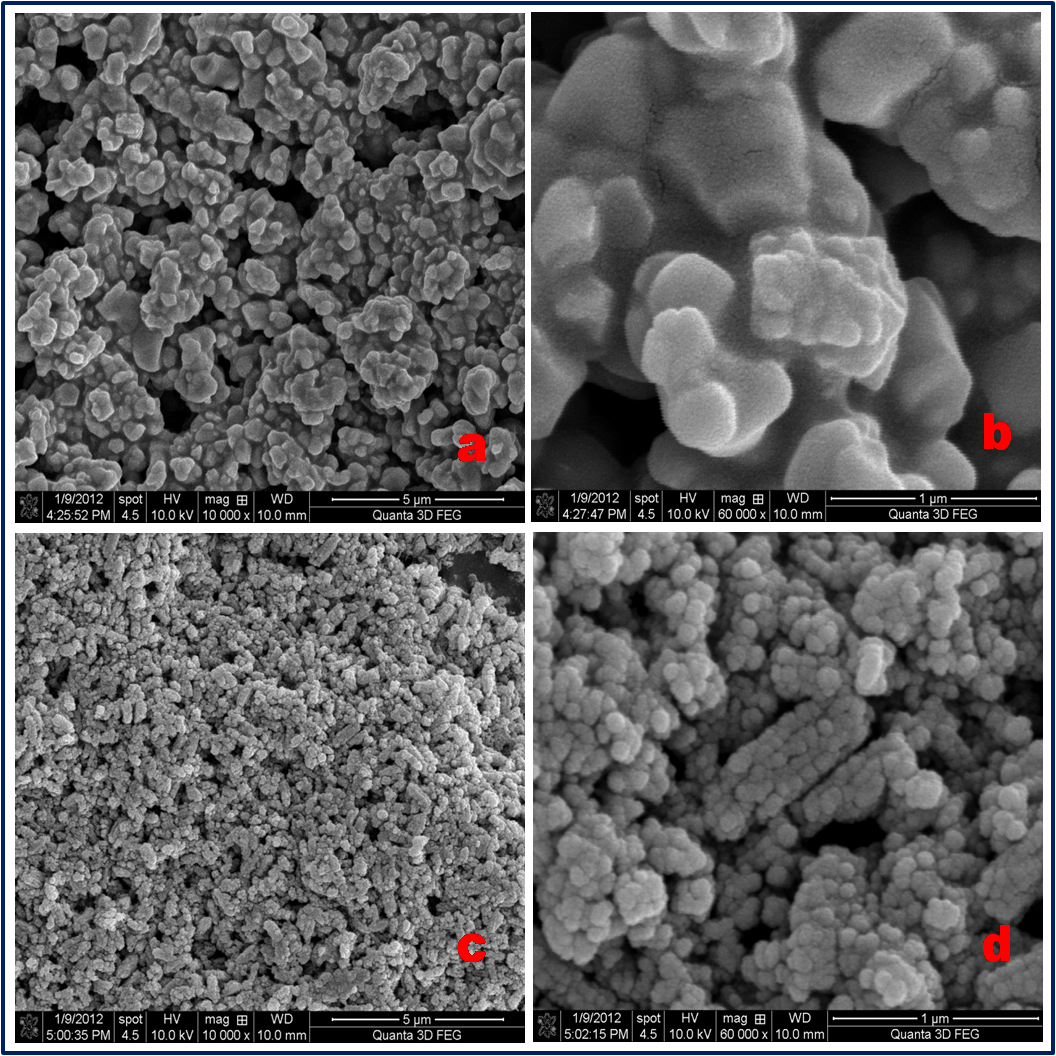


**Figure S1: FESEM micrograph of (a, b) pure micron and (c, d) pure nano sized CuO.**


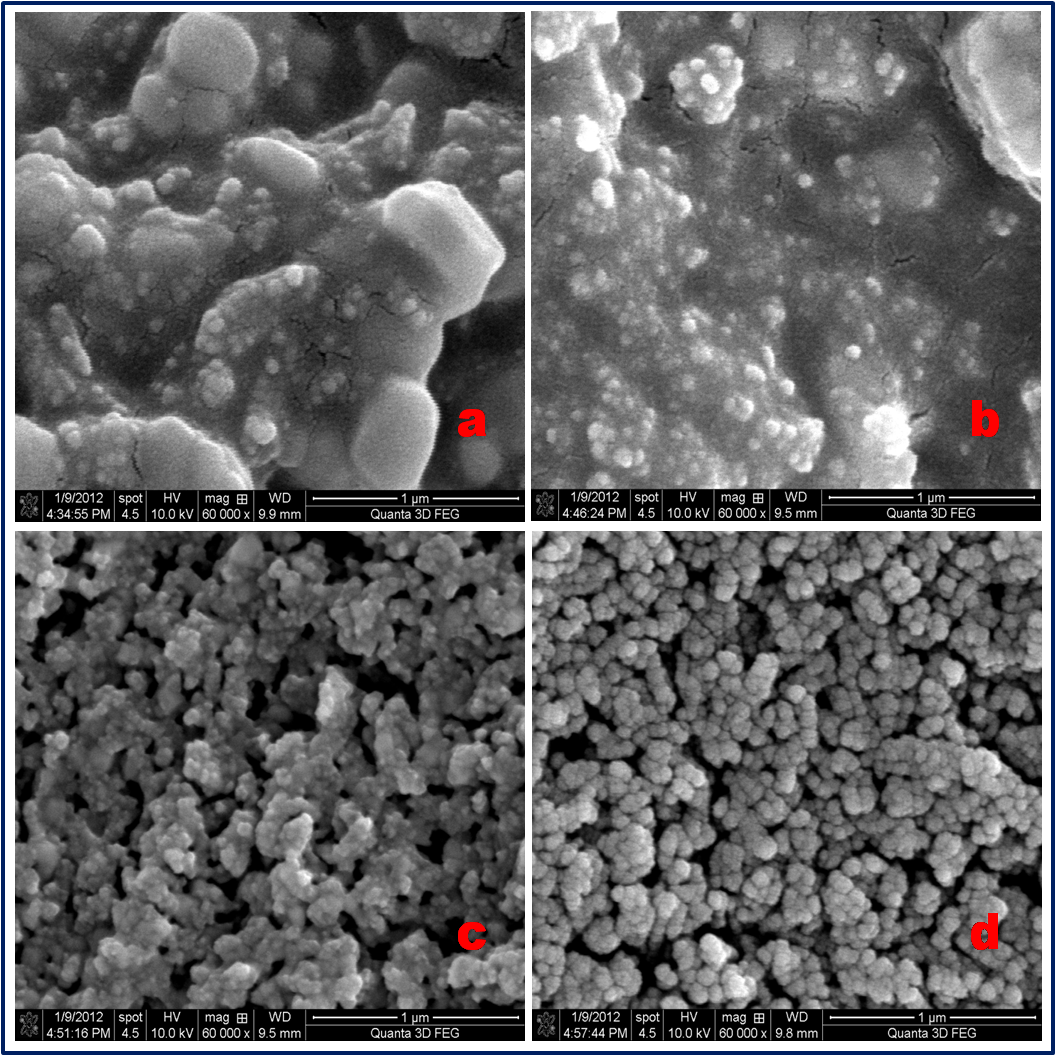


**Figure S2: FESEM micrograph of nano-micron composites of CuO**

**(a) 20 % (b) 40 % (c) 50 % (d) 60 %**


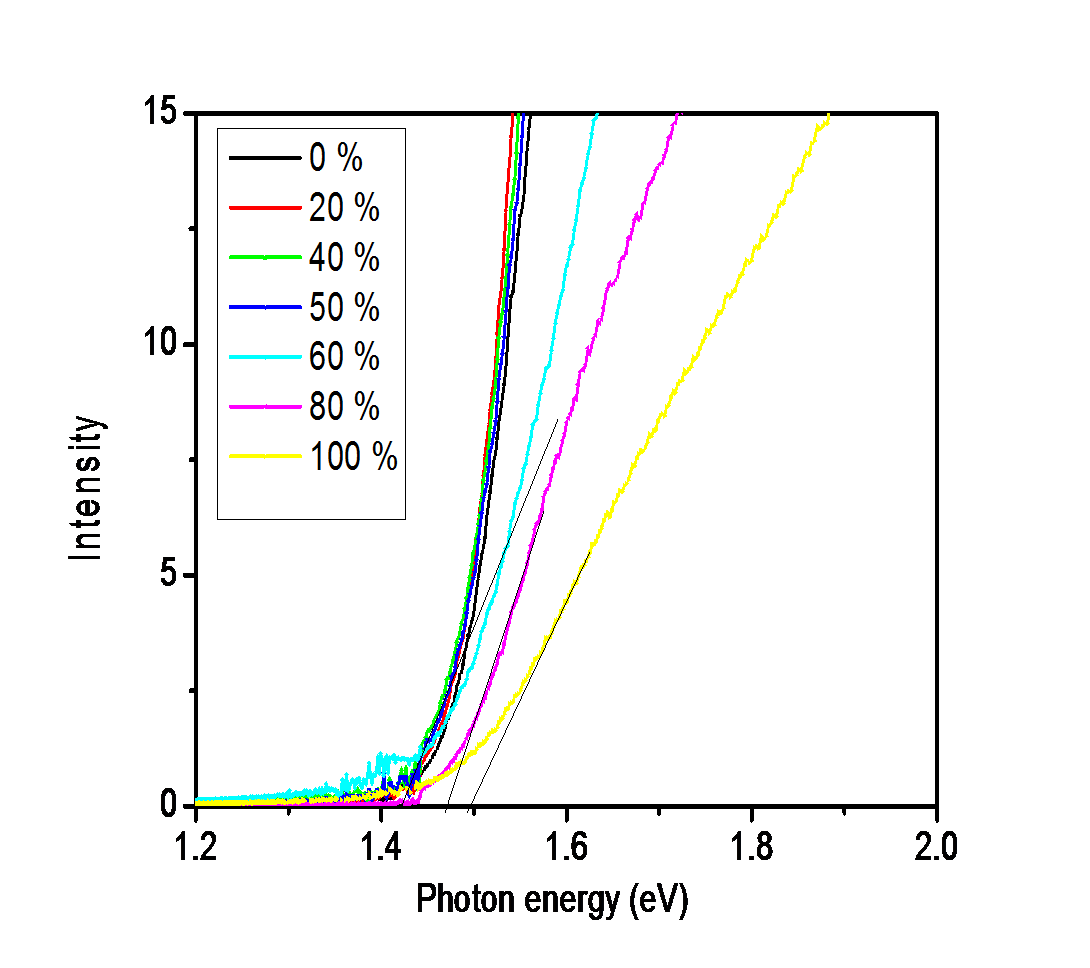


**Figure S3: Diffuse reflectance spectra of CuO composites**


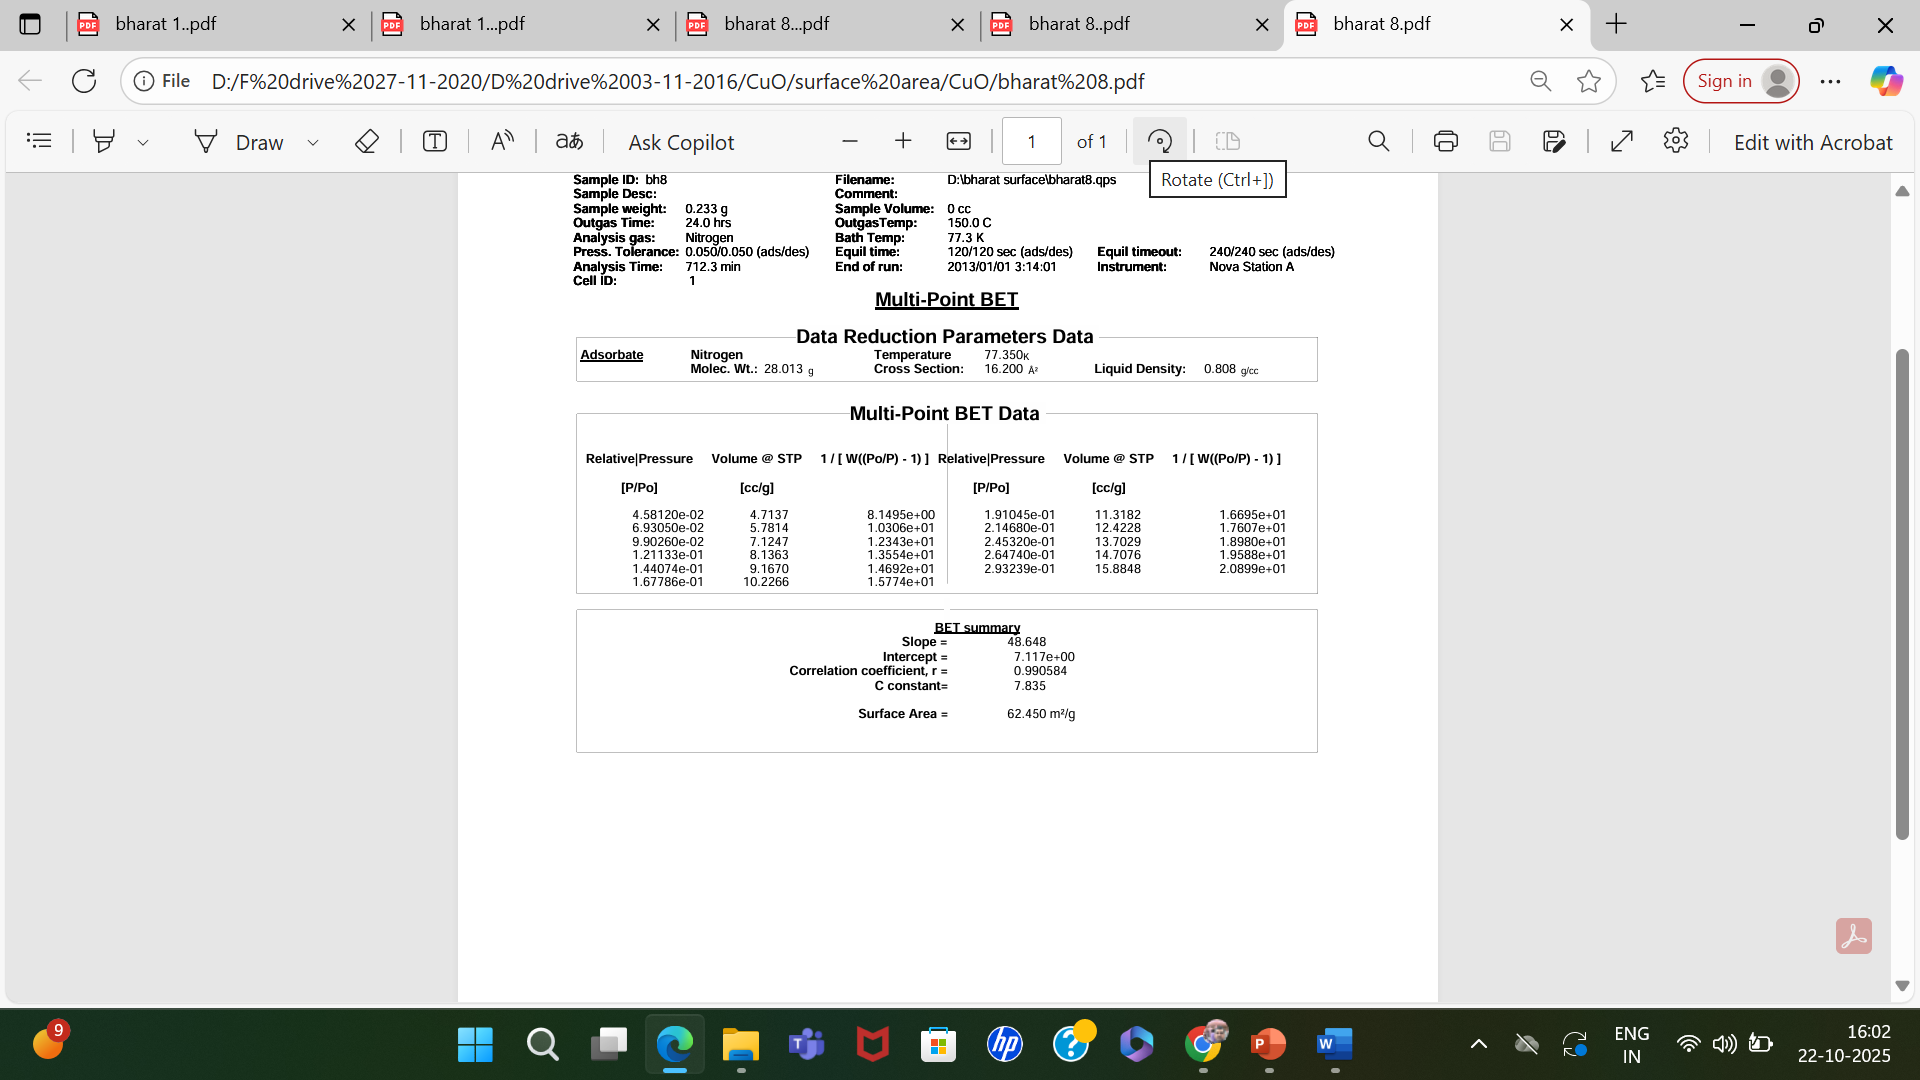

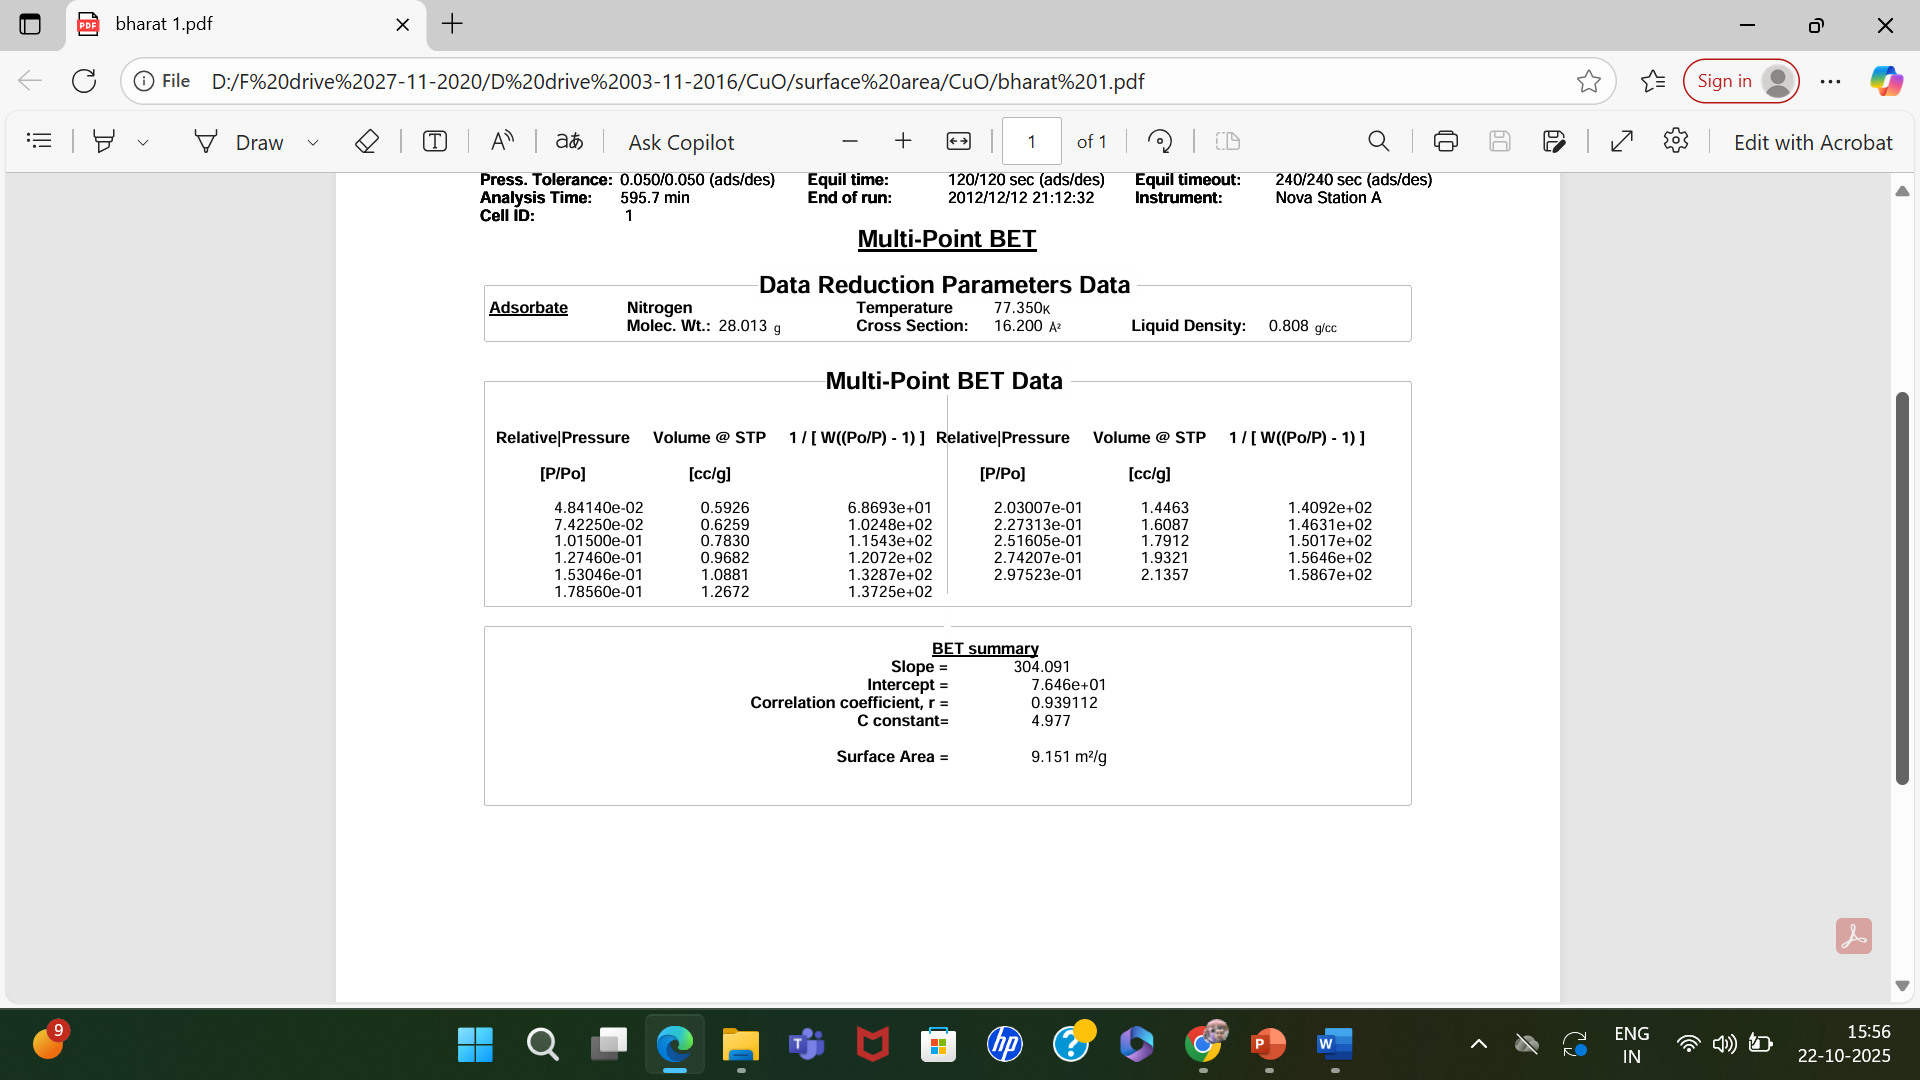


**Pure Micron**

**Pure Nano**

**Figure S4: Hydrogen evolves during HER (bubble in red circle) respectively**

**Figure S4: BET analysis of N2 adsorption-desorption isotherm of pure micron and pure**

**nano CuO particles.**


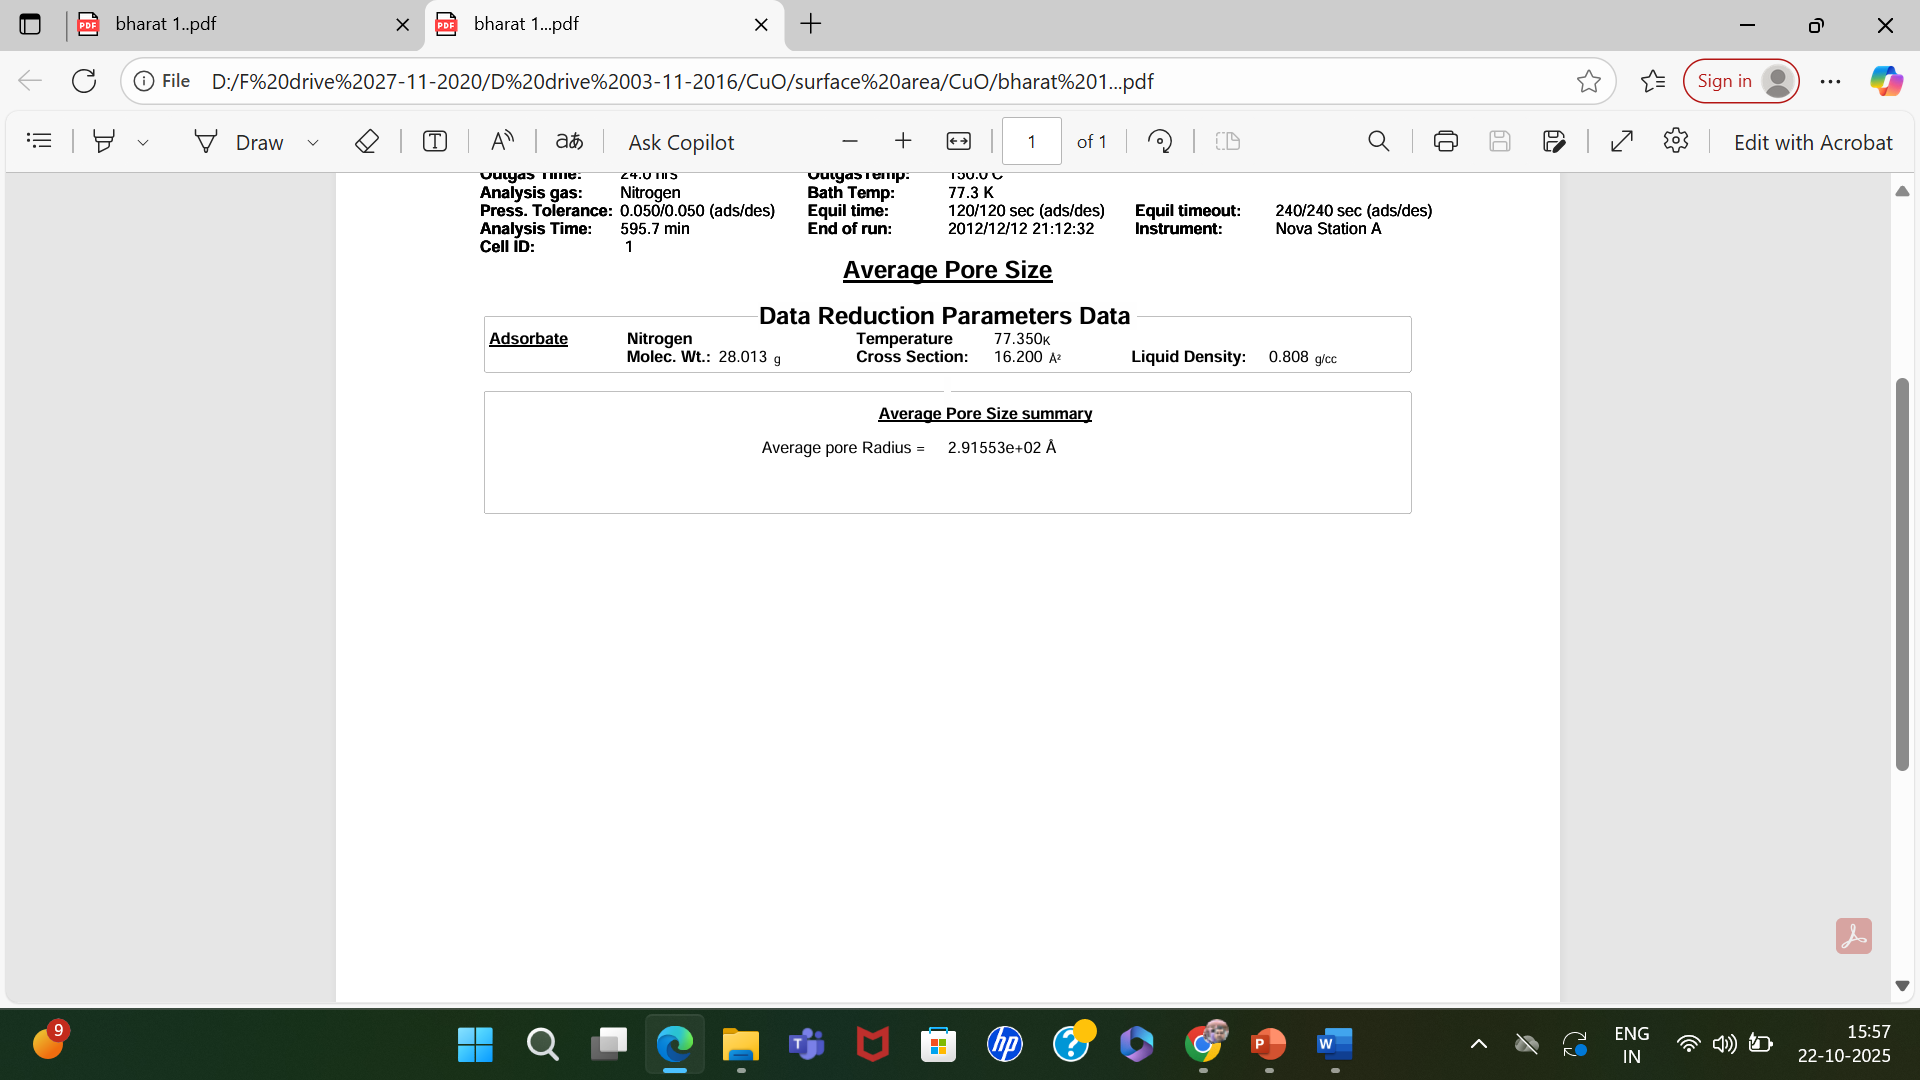

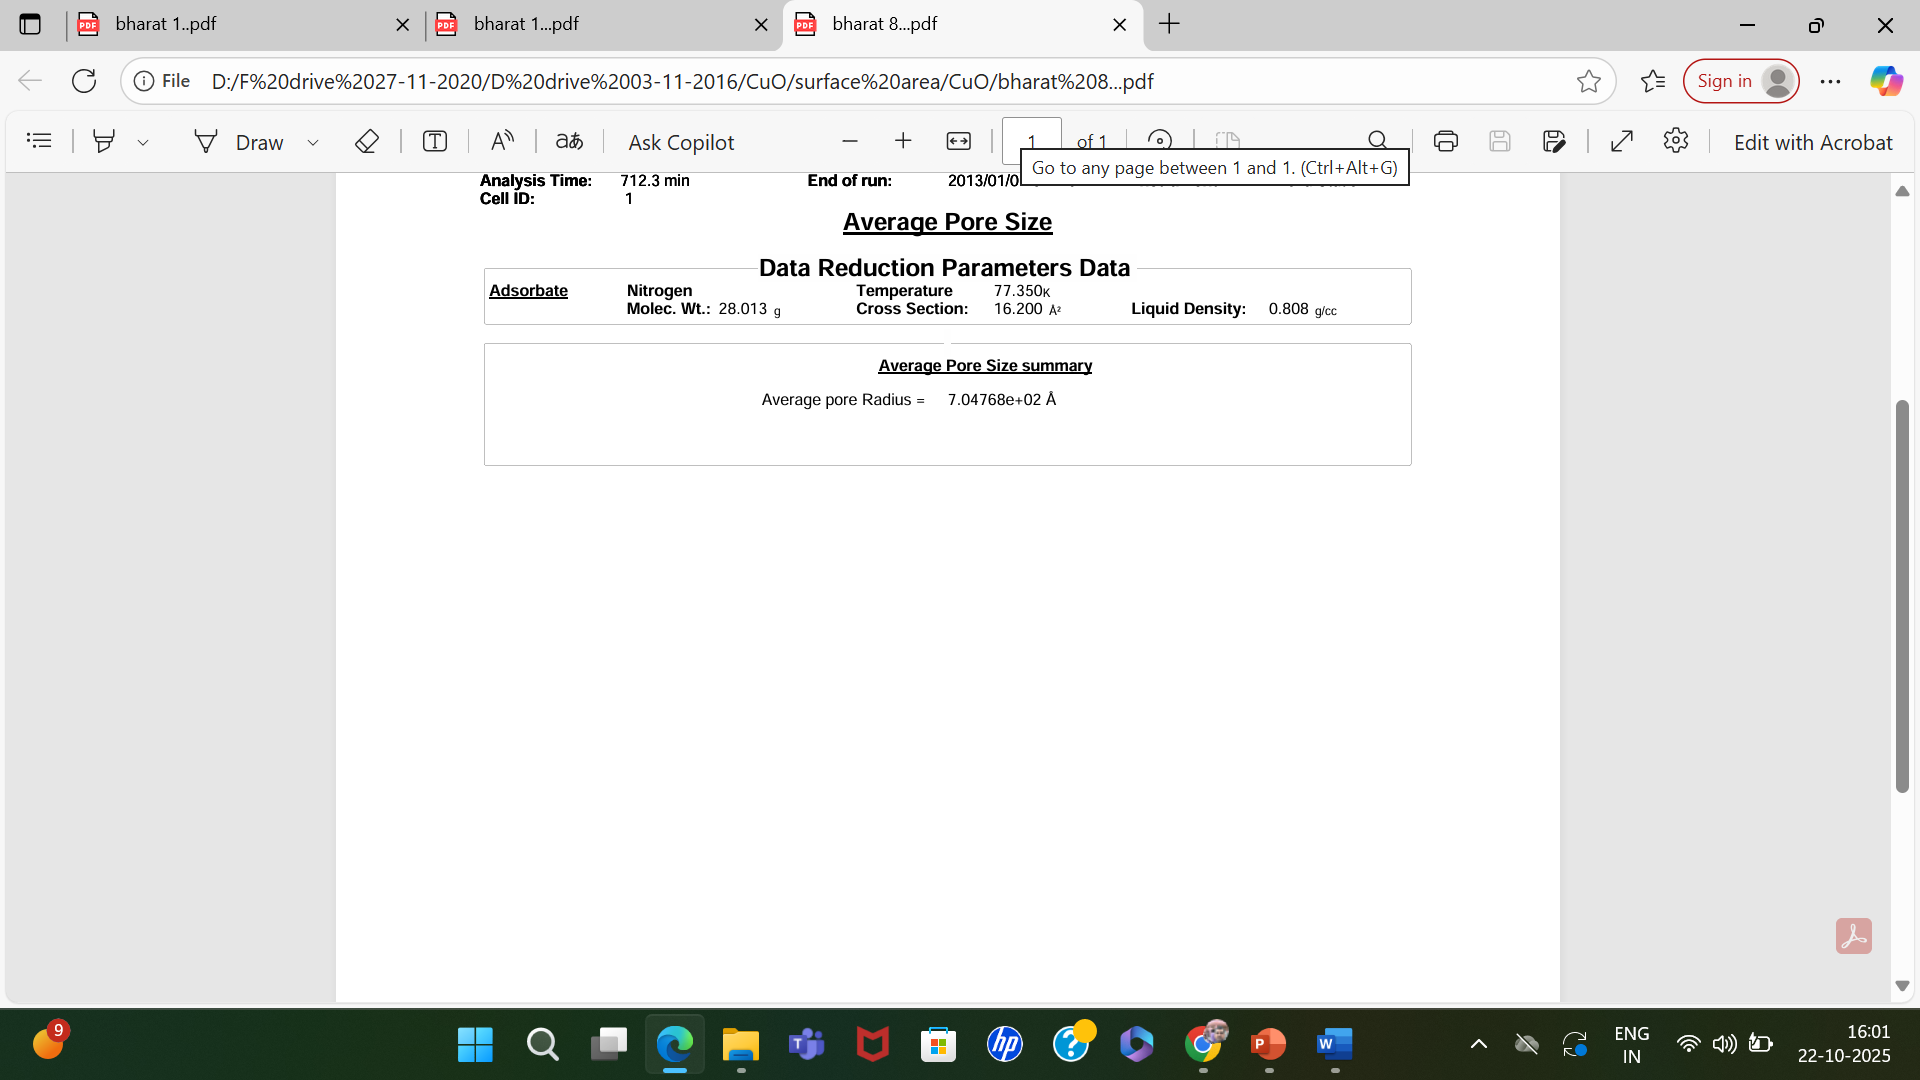


**Pure Micron**

**Pure Nano**

**Figure S5: average pore size of pure micron and pure nano CuO particles.**


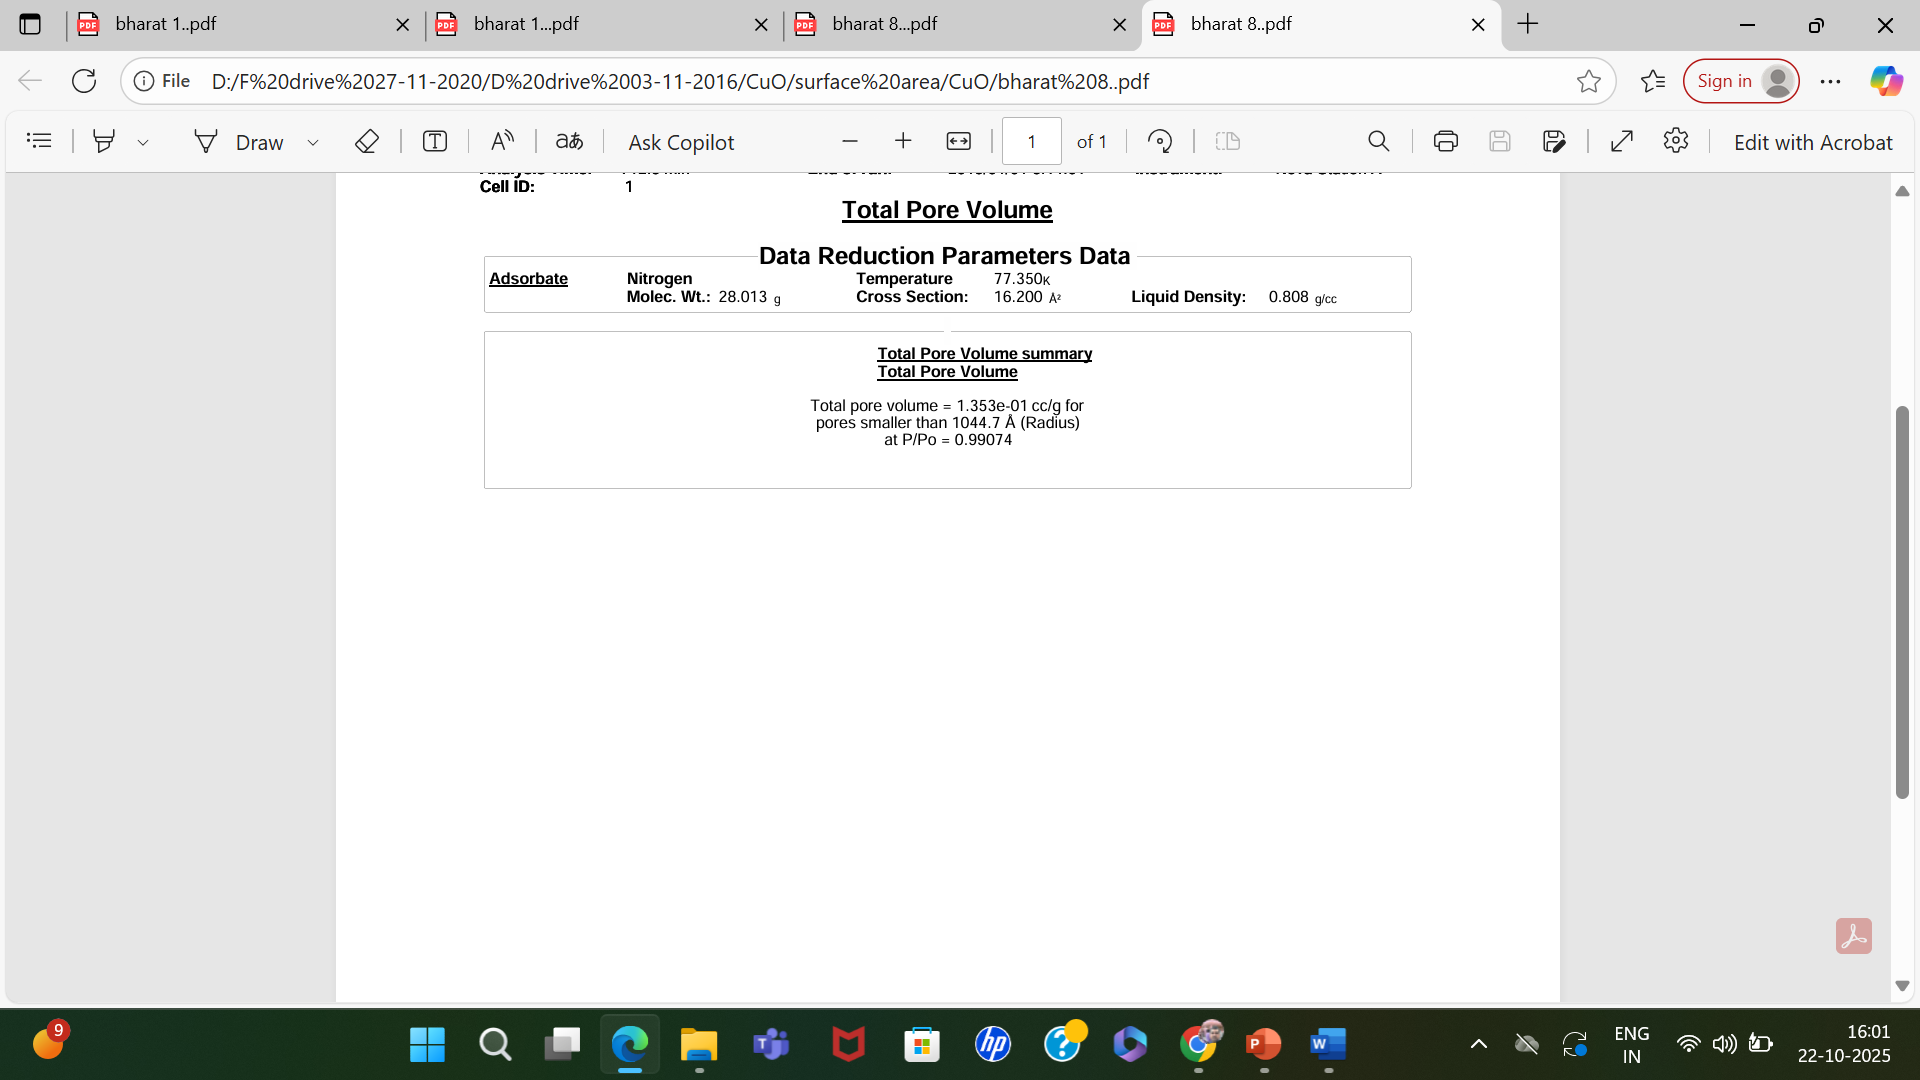

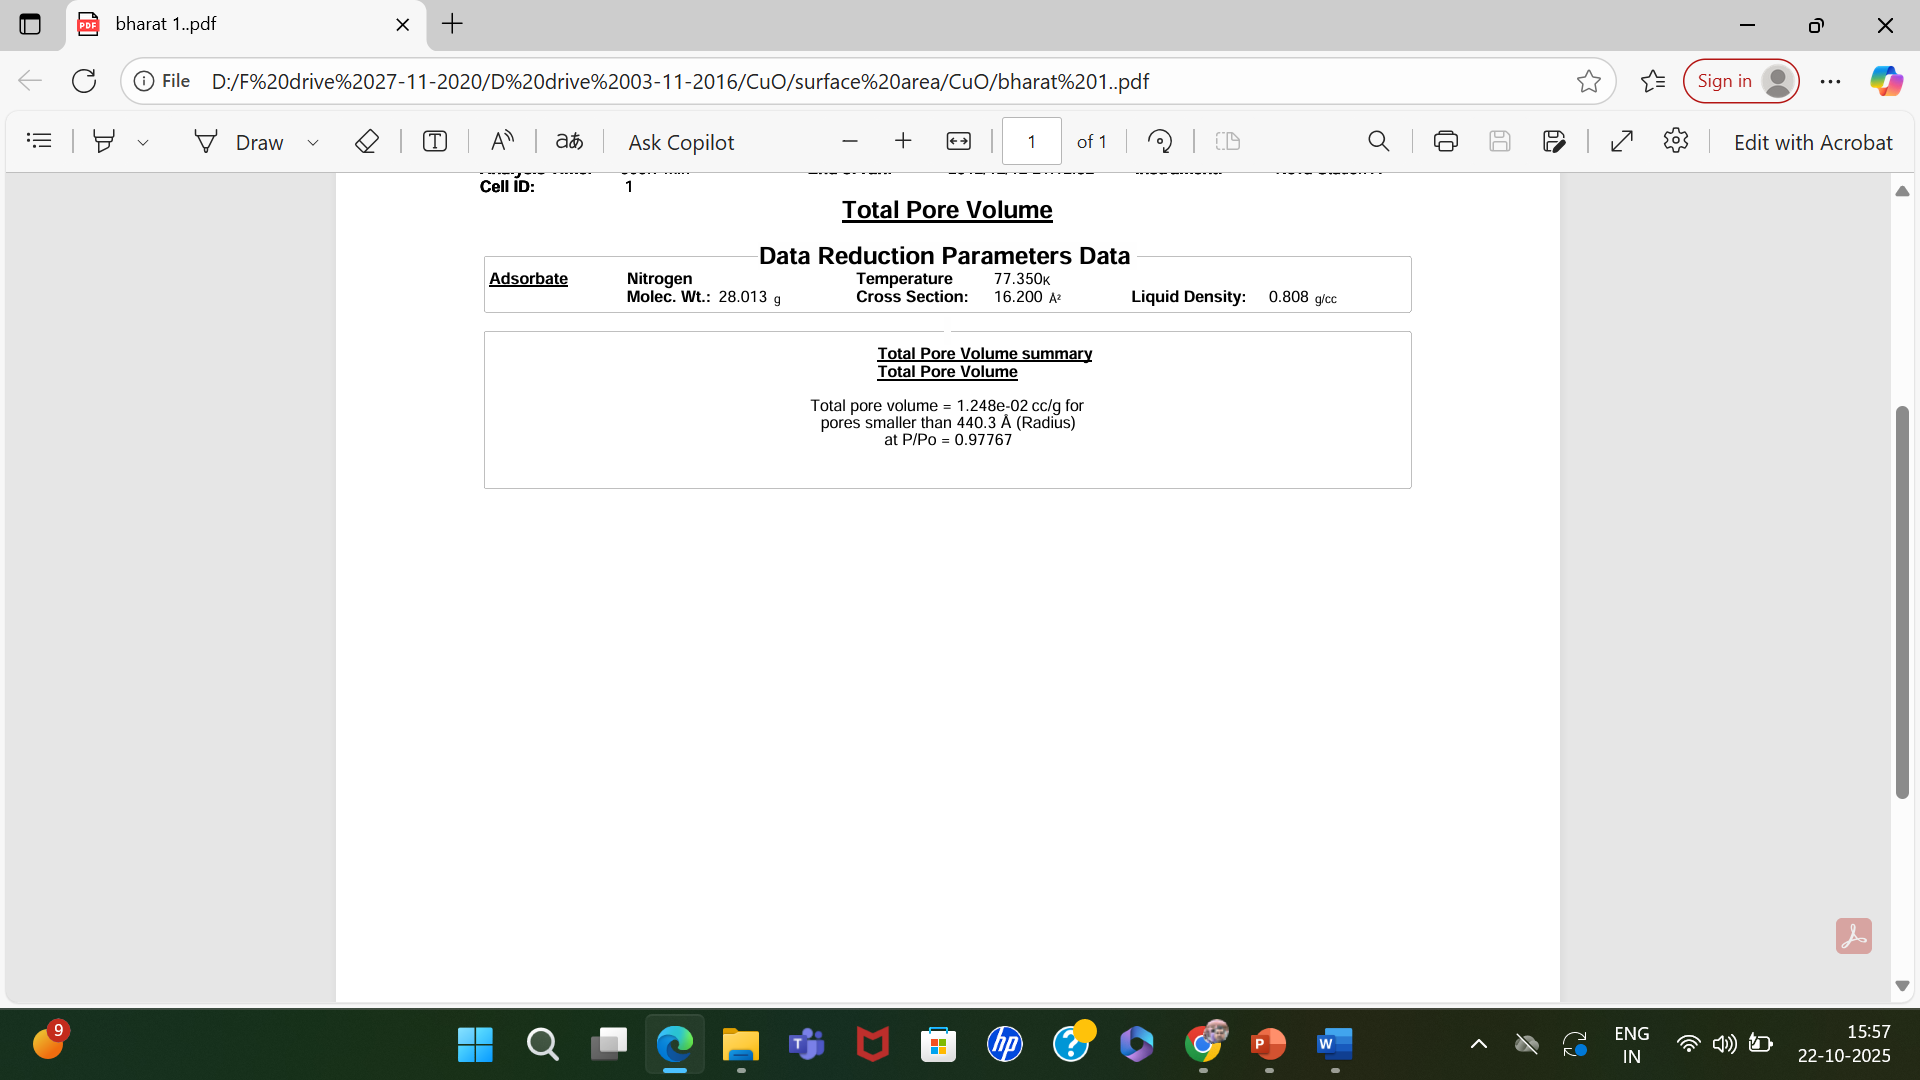


**Pure Micron**

**Pure Nano**

**Figure S6: Total pore volume of pure micron and pure nano CuO particles.**


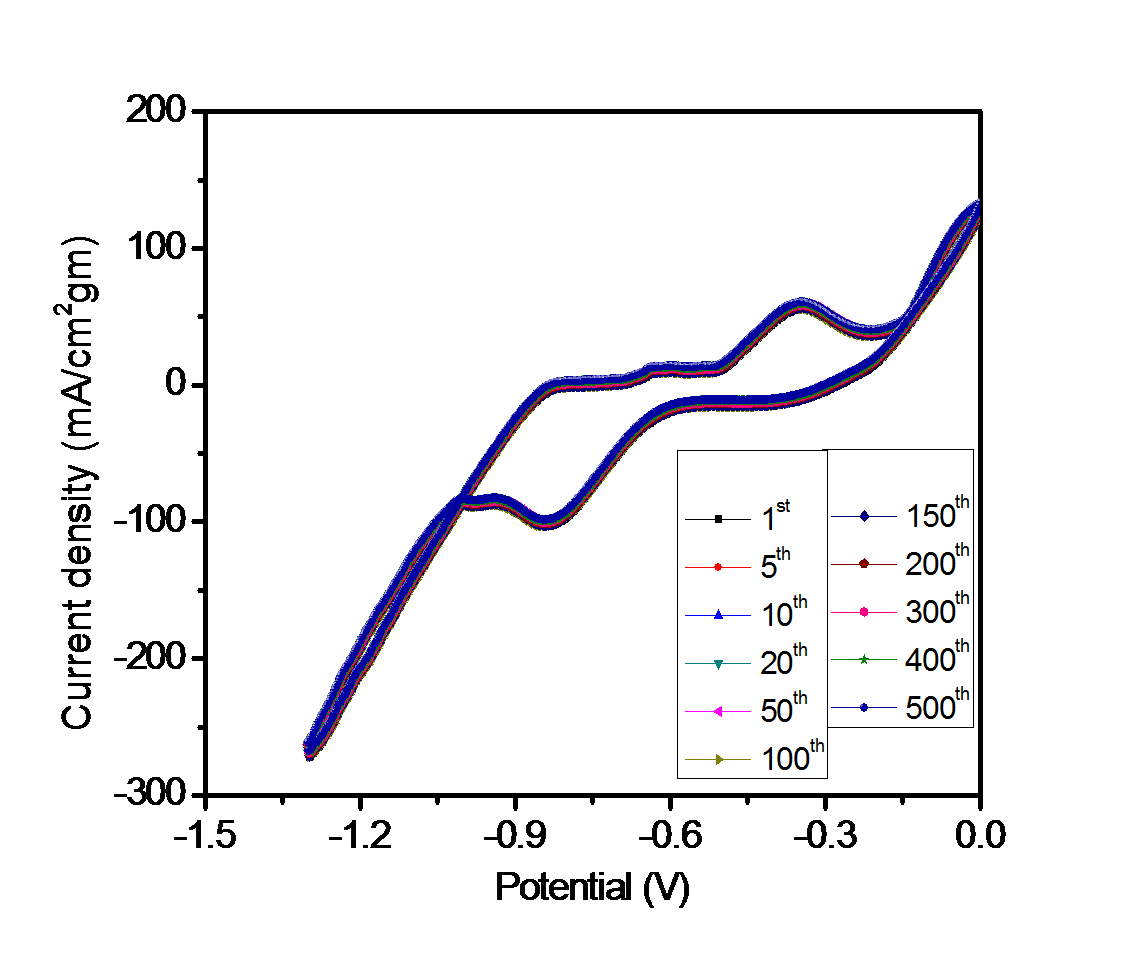


**Figure S7: Stability of current density obtained by pure CuO nanoparticles**

**Figure S8: Comparison of Powder X-ray diffraction pattern of pure nano size CuO before**

**and after HER**


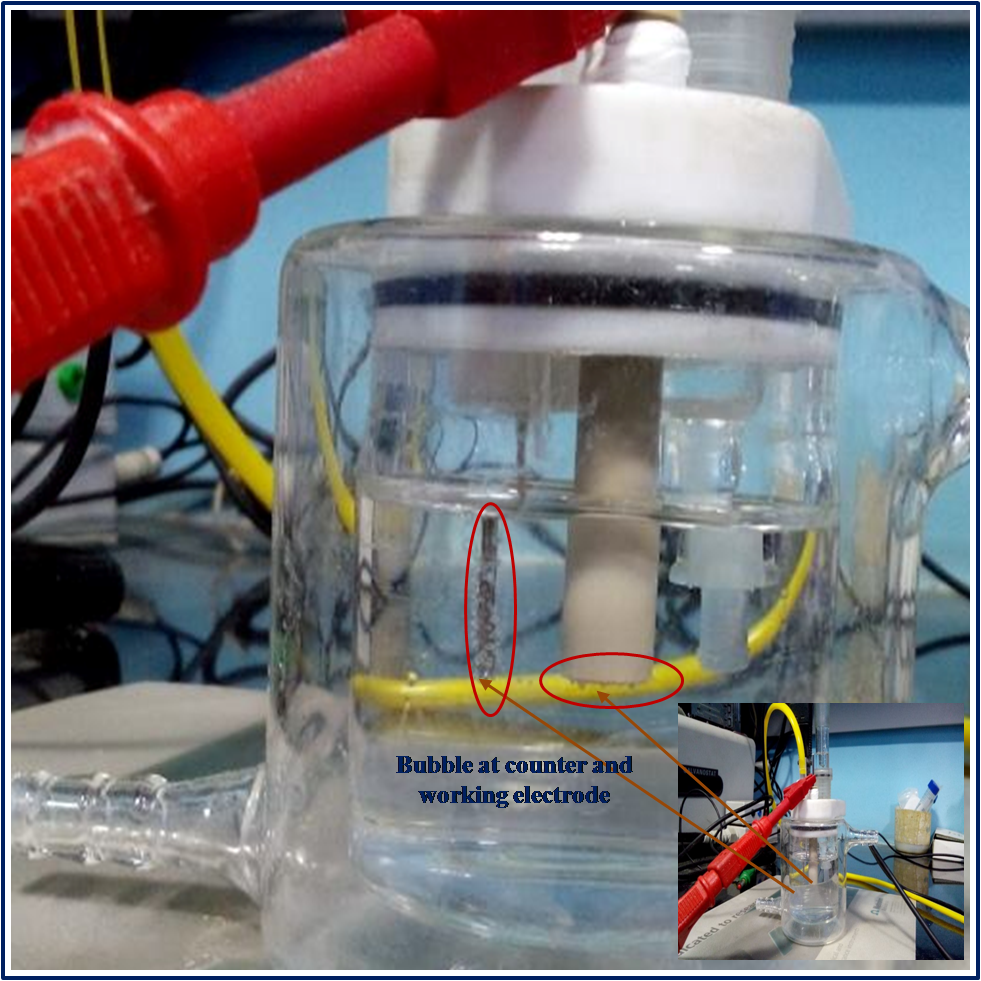


**Figure S9: Hydrogen evolves during HER (bubble in red circle)**

**Conversion Formula from Ag/AgCl to** **Reversible Hygrogen Electrode (RHE)**

ERHE = EAg/AgCl + 0.197 + 0.0591 x pH

Where ERHE = Potential versus RHE

EAg/AgCl measured potential = -1.3 V

Standard potential difference between Ag/AgCl and SHE at 25 °C = 0.197 V

0.0591 × pH = correction term for solution pH

For 0.5 M KOH, pH = 13.7

ERHE = -1.3 + 0.197 + 0.0591 x 13.7

= -1.3 + 0.197 + 0.8097

= - 1.3 + 1.0067

= - 0.293 V

**ERHE = -0.293 V**
